# Supplementary material
Source: Springer Nature journal article supplement (https://www.springermedizin.de/resource/supplementary/12990_2013_590_MOESM3_ESM.pdf/9613580)

# Ultrasonic vocalizations to innocuous stimuli

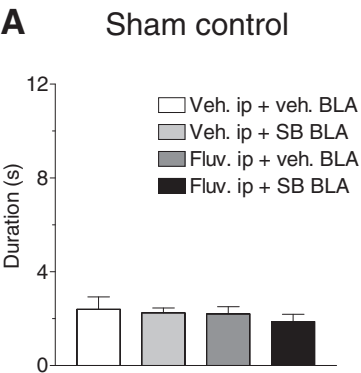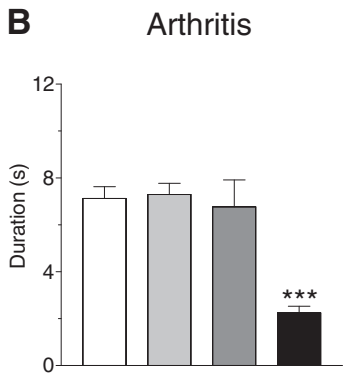

# Ultrasonic vocalizations to noxious stimuli

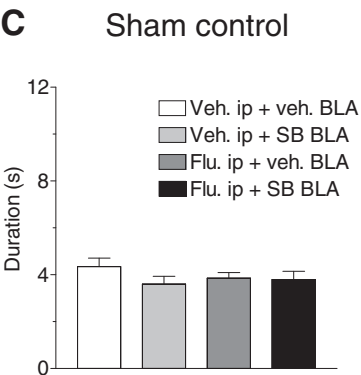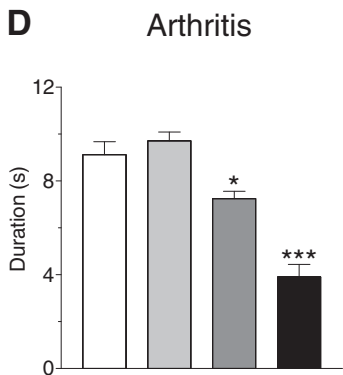

Supplement: MOESM3 [file 9613580]
